# Supplementary material for: Reprogramming by drug-like molecules leads to regeneration of cochlear hair cell–like cells in adult mice
Source: PubMed Central journal article supplement — Proc Natl Acad Sci U S A. 2023 Apr 17;120(17):e2215253120. doi: 10.1073/pnas.2215253120 (PMC10151514; doi:10.1073/pnas.2215253120), 2023-04-17
Supplement: pnas.2215253120.sd06.pdf [file pnas.2215253120.sd06.pdf]

## Sequences for the siRNAs

Mxi1 siRNA (m) is a pool of 3 different siRNA duplexes:

A:

- Sense: CACGUGGGGAAAUCAUCUATT
- Antisense: UAGAUGAUUUCCCCACGUGTT

B:

- Sense: CAGCUUUAACCAUCUGAUATT
- Antisense: UAUCAGAUGGUUAAAGCUGTT

C:

- Sense: GUUCCCUCUGUCUUUCAATT
- Antisense: UUUGAAAGACAGAGGGAATT

Note: all sequences are provided in 5' → 3' orientation.

FIR siRNA (m) is a pool of 3 different siRNA duplexes:

A:

- Sense: GCUUUGGAGCAGAUGAACUtt
- Antisense: AGUUCAUCUGCUCCAAAGCtt

B:

- Sense: CUAGGGCUUUAACCGAAUtt
- Antisense: AUUCGGUUGAAAGCCCUAGtt

C:

- Sense: GAACCGGGUCAUUAUCUAUtt
- Antisense: AUAGAUAAUGACCCGGUUCtt

Note: all sequences are provided in 5' → 3' orientation.

## Sequences for the adenoviral vector (Ad-CMV-Atoh1-V5)

AAAGCGGATGTTGTAGTAAATTTGGGCGTAACCGAGTAAGATTTGGCCATTTTCGCGGGAAAACCTGAATAAGAGGAAGTG  
AAATCTGAATAATTTTGTGTTACTCATAGCGCGTAATATTTGTCTAGGGCCGCGGGGACTTTGACCGTTTACGTGGAGAC  
TCGCCCAGGTGTTTTTCTCAGGTGTTTTCCGCGTTCCGGGTCAAAGTTGGCGTTTTATTATTATAGTCAGTCGAAGCTTG  
GATCCGGTACCTCTAGAATTCTCGAGCGGCCGCTAGCGACATCGGATCTCCCATCCCCTATGGTGCACCTCTCAGTACAA  
TCTGCTCTGATGCCGCATAGTTAAGCCAGTATCTGCTCCCTGCTTGTGTGTTGGAGGTCGCTGAGTAGTGC GCGAGCAAA  
ATTTAAGCTACAACAAGGCAAGGCTTGACCGACAATTGCATGAAGAATCTGCTTAGGGTTAGGCGTTTTGCGCTGCTTCG  
CGATGTACGGGCCAGATATACGCGTTGACATTGATTATTGACTAGTTATTAATAGTAATCAATTACGGGGTCATTAGTTC  
ATAGCCATATATGGAGTTCGCGTTACATAAATTACGGTAAATGGCCCGCTGGCTGACCGCCCAACGACCCCGCCCA  
TTGACGTCAATAATGACGTATGTTCCCATAGTAACGCAATAGGAGCTTTCCATTGACGTCAATGGGTGGAGTATTTACG  
GTAAACTGCCCACTTGGCAGTACATCAAGTGTATCATATGCCAAGTACGCCCCCTATTGACGTCAATGACGGTAAATGGC  
CCGCTGGCATTATGCCCAGTACATGACCTTATGGGACTTTTCTACTTGGCAGTACATCTACGTATTAGTCATCGCTATT  
ACCATGGTGTATGCGTTTTTGGCAGTACATCAATGGGCGTGGATAGCGGTTTTGACTCACGGGGATTTCCAAGTCTCCACCC  
CATTGACGTCAATGGGAGTTTTGTTTTGGCACAAAATCAACGGGACTTTCCAATAATGTCGTAACAACCTCCGCCCCATTGA  
CGAAATGGGCGGTAGGCGTGTACGGTGGGAGGTCTATATAAGCAGAGCTCTCTGGCTAACTAGAGAACCCACTGCTTAC  
TGGCTTATCGAAATTAATACGACTCACTATAGGGAGACCCAAGCTGGCTAGTTAAGCTATCAACAAGTTTTGTACAAAAA  
GCAGGCTCCACCATGTCCCGCTGCTGCATGCAGAAGAGTGGGCTGAAGTGAAGGAGTTGGGAGACCACCATCGCCAGCC  
CCAGCCGCATCATCTCCC GCAACCGCCGCGCCGCGCCGAGCCACCTGCAACTTTGCAGGCGAGAGAGCATCCCGTCTACC  
CGCTGAGCTGTCCCTCCTGGACAGCACCGACCCACGCGCCTGGCTGGCTCCCACTTTGCAGGGCATCTGCACGGCACGC  
GCCGCCAGTATTTGCTACATTTCCCGGAGCTGGGTGCCTCAGAGGCCGCTGCGCCCCGGGACGAGGTGGACGGCCGGGG  
GGAGCTGGTAAGGAGGAGCAGCGGCGGTGCCAGCAGCAGCAAGAGCCCCGGGCGGTGAAAGTGCGGGAACAGCTGTGCA  
AGCTGAAAGGCGGGTGGTGGTAGACGAGCTGGCTGCAGCCGCCAACGGGCCCTTCCAGCAAACAGGTGAATGGGGTG  
CAGAAGCAGAGACGGCTAGCAGCCAACGCCAGGGAGCGGCGCAGGATGCATGGGCTGAACCACGCCTTCGACCAGCTGCG  
CAATGTTATCCCGTCGTTCAACAACGACAAGAAGCTGTCCAAATATGAGACCCTGCAGATGGCCCAAATCTACATCAACG  
CCTTGTCCGAGCTGCTACAAACGCCAGCGGAGGGGAACAGCCACC GCGCCTCCAGCCTCCTGCAAAAGCGACCACCAC  
CACCTTCGACCCGCGCCTCCTATGAAGGGGGCGGGCAACGCGACCCGAGCTGGGGCTCAGCAGGCTTCCGGAGGGAG  
CCAGCGGCCGACCCCGCCGGGAGTTGCCGGACTCGCTTCTCAGCCCCAGCTTCTGCGGGAGGGTACTCGGTGCAGCTGG  
ACGCTCTGCACCTTCTCGACTTTTCGAGGACAGCGCCCTGACAGCGATGATGGCGCAAAAGAATTTGTCTCCTTCTCTCCCC  
GGGAGCATCTTGCAGCCAGTGCAGGAGGAAAACAGCAAAACTTCGCCTCGGTCCACAGAAGCGACGGGGAATTTTCCCC  
CCATTCCCATTACAGTGACTCGGATGAGGCAAGTTTGGACCCAGCTTTCTTGTACAAAGTGGTTGATCTAGAGGGCCCCG  
GGTTCGAAGGTAAGCCTATCCCTAACCTCTCCTCGGTCTCGATTCTACGCGTACC GGTAGTAATGAGTTTTAAACGGGG  
GAGGCTAACTGAAACACGGAAGGAGACAATACCGGAAGGAACCCGCGCTATGACGGCAATAAAAAGACAGAATAAAACGC  
ACGGGTGTTGGGTGCTTTGTTTCATAAACGCGGGGTTCCGGTCCCAGGGCTGGCACTCTGTGATACCCACCCGAGACCCCA  
TTGGGCCAATACGCCCCGCTTTCTTCTTTTCCCCACCCCAACCCCAAGTTTCGGGTGAAGGCCAGGGCTCGCAGCCA  
ACGTCGGGGCGGCAGGCCCTGCCATAGCAGATCCGATTTCGACAGATCACTGAAATGTGTGGGCGTGGCTTAAGGGTGGGA  
AAGAATATATAAGGTGGGGTCTTATGTAGTTTTGTATCTGTTTTG CAGCAGCCCGCCGCCATGAGACCAACTCGTT  
TGATGGAAGCATTGTGAGCTCATATTTGACAACGCGCATGCCCCATGGGCGGGGTGCGTCAGAATGTGATGGGCTCCA  
GCATTGATGGTGC CCCCCTCCTGCCCGCAAACCTCTACTACCTTGA

4-230: human Ad5 228-454  
507-1090: hCMV-IE promoter/enhancer  
1135-1151: T7 promoter  
1213-2273: human ATOH1 ORF  
2329-2370: V5 tag  
2380-2388: Stop codon 3x  
2688-2925: human Ad5 3513-3750
